# Supplementary material
Source: PubMed Central journal article supplement (PMC4187798)
Supplement: IAI.02067-14_zii999090858so1.pdf [file IAI.02067-14_zii999090858so1.pdf]

**Table S1****Mouse Innate and Adaptive Immune Responses Array<sup>a</sup>.**

(i) Genes with significant fold-change in at least one comparison group

| <b>Gene symbol</b> | <b>1 v Resting<sup>b</sup></b> |                 | <b>1861 v Resting<sup>c</sup></b> |                 | <b>1861 v 1<sup>d</sup></b> |                 |
|--------------------|--------------------------------|-----------------|-----------------------------------|-----------------|-----------------------------|-----------------|
|                    | <b>fold-change</b>             | <b>p-value</b>  | <b>fold-change</b>                | <b>p-value</b>  | <b>fold-change</b>          | <b>p-value</b>  |
| <i>C3</i>          | <b>2.33</b>                    | <b>0.042222</b> | 2.33                              | 0.121247        | -1                          | 0.7882          |
| <i>C5ar1</i>       | <b>4.72</b>                    | <b>0.010175</b> | 2.04                              | 0.190194        | -2.31                       | 0.289267        |
| <i>Casp1</i>       | <b>2.55</b>                    | <b>0.025216</b> | <b>4.42</b>                       | <b>0.004456</b> | 1.73                        | 0.069515        |
| <i>Ccr5</i>        | <b>3.44</b>                    | <b>0.028083</b> | <b>3.18</b>                       | <b>0.030649</b> | -1.08                       | 0.831375        |
| <i>Cd14</i>        | <b>36.69</b>                   | <b>0.013988</b> | <b>28.55</b>                      | <b>0.000313</b> | -1.29                       | 0.343981        |
| <i>Cd40</i>        | 3.04                           | 0.08034         | <b>6.28</b>                       | <b>0.000933</b> | 2.06                        | 0.140353        |
| <i>Cd80</i>        | <b>13</b>                      | <b>0.019732</b> | <b>5.97</b>                       | <b>0.000009</b> | -2.18                       | 0.082487        |
| <i>Cd86</i>        | <b>2.51</b>                    | <b>0.021136</b> | <b>4.49</b>                       | <b>0.001248</b> | 1.79                        | 0.052369        |
| <i>Crp</i>         | 1.19                           | 0.831302        | <b>8.2</b>                        | <b>0.01177</b>  | <b>6.91</b>                 | <b>0.012007</b> |
| <i>Csf2</i>        | <b>14.25</b>                   | <b>0.000369</b> | <b>9.42</b>                       | <b>0.000044</b> | -1.51                       | 0.038636        |
| <i>Cxcl10</i>      | <b>662.83</b>                  | <b>0.001682</b> | <b>3386.31</b>                    | <b>0.00734</b>  | <b>5.11</b>                 | <b>0.018987</b> |
| <i>Ddx58</i>       | 2.65                           | 0.063235        | <b>5.21</b>                       | <b>0.045466</b> | 1.97                        | 0.1788          |
| <i>H2-T23</i>      | 1.95                           | 0.004957        | <b>3.27</b>                       | <b>0.027865</b> | 1.67                        | 0.115347        |
| <i>Icam1</i>       | <b>4.37</b>                    | <b>0.003849</b> | <b>4.05</b>                       | <b>0.001961</b> | -1.08                       | 0.717717        |
| <i>Ifna2</i>       | 2.64                           | 0.124689        | <b>9.77</b>                       | <b>0.010836</b> | <b>3.69</b>                 | <b>0.039819</b> |
| <i>Ifnb1</i>       | 38.72                          | 0.086293        | <b>59.94</b>                      | <b>0.026515</b> | 1.55                        | 0.666804        |
| <i>Ifng</i>        | <b>55.52</b>                   | <b>0.003099</b> | <b>345.61</b>                     | <b>0.001729</b> | <b>6.22</b>                 | <b>0.004487</b> |
| <i>Il10</i>        | <b>5.5</b>                     | <b>0.032818</b> | <b>12.21</b>                      | <b>0.000158</b> | <b>2.22</b>                 | <b>0.039173</b> |
| <i>Il13</i>        | <b>2.34</b>                    | <b>0.022911</b> | 4.38                              | 0.1004          | 1.87                        | 0.185129        |
| <i>Il17a</i>       | 4.59                           | 0.085905        | <b>10.04</b>                      | <b>0.004866</b> | 2.19                        | 0.128599        |
| <i>Il1a</i>        | <b>12.51</b>                   | <b>0.000949</b> | <b>20.08</b>                      | <b>0.000097</b> | 1.61                        | 0.041196        |

|                |               |                 |               |                 |             |                 |
|----------------|---------------|-----------------|---------------|-----------------|-------------|-----------------|
| <i>Il1b</i>    | <b>56.2</b>   | <b>0.006878</b> | <b>63.47</b>  | <b>0.000089</b> | 1.13        | 0.976548        |
| <i>Il1r1</i>   | <b>3.62</b>   | <b>0.005194</b> | <b>3.31</b>   | <b>0.000258</b> | -1.09       | 0.552768        |
| <i>Il23a</i>   | <b>36.57</b>  | <b>0.007967</b> | <b>51.2</b>   | <b>0.007169</b> | 1.4         | 0.44115         |
| <i>Il6</i>     | <b>146.02</b> | <b>0.000707</b> | <b>161.79</b> | <b>0.039374</b> | 1.11        | 0.489806        |
| <i>Irf7</i>    | 7.29          | 0.05966         | <b>19.88</b>  | <b>0.001002</b> | <b>2.73</b> | <b>0.047797</b> |
| <i>Itgam</i>   | <b>6.55</b>   | <b>0.003824</b> | <b>12.58</b>  | <b>0.003667</b> | 1.92        | 0.074304        |
| <i>Jak2</i>    | <b>2.86</b>   | <b>0.018894</b> | <b>3.85</b>   | <b>0.025788</b> | 1.35        | 0.322896        |
| <i>Mx1</i>     | <b>16.97</b>  | <b>0.03917</b>  | <b>57.6</b>   | <b>0.000637</b> | <b>3.39</b> | <b>0.019798</b> |
| <i>Myd88</i>   | <b>2.65</b>   | <b>0.031416</b> | 3.22          | 0.093048        | 1.21        | 0.38883         |
| <i>Nfkb1</i>   | 2.1           | 0.090458        | <b>3.44</b>   | <b>0.018081</b> | 1.64        | 0.173956        |
| <i>Nlrp3</i>   | <b>38.19</b>  | <b>0.004434</b> | <b>54.21</b>  | <b>0.001199</b> | 1.42        | 0.287334        |
| <i>Nod2</i>    | <b>9.66</b>   | <b>0.015706</b> | <b>19.07</b>  | <b>0.030232</b> | 1.97        | 0.192484        |
| <i>Slc11a1</i> | <b>3.47</b>   | <b>0.034254</b> | <b>2.62</b>   | <b>0.0104</b>   | -1.33       | 0.350404        |
| <i>Stat1</i>   | 1.99          | 0.023412        | <b>6.94</b>   | <b>0.010506</b> | <b>3.5</b>  | <b>0.020219</b> |
| <i>Stat3</i>   | 2.78          | 0.053387        | <b>3.3</b>    | <b>0.01169</b>  | 1.19        | 0.786819        |
| <i>Tlr2</i>    | 9.61          | 0.053321        | <b>24.9</b>   | <b>0.003962</b> | 2.59        | 0.074846        |
| <i>Tlr3</i>    | 1.34          | 0.25329         | <b>2.52</b>   | <b>0.003177</b> | 1.88        | 0.03784         |
| <i>Tlr4</i>    | <b>2.7</b>    | <b>0.032918</b> | <b>5.32</b>   | <b>0.010844</b> | 1.97        | 0.108524        |
| <i>Tlr5</i>    | <b>-2.26</b>  | <b>0.002038</b> | <b>-3.69</b>  | <b>0.000608</b> | -1.63       | 0.080217        |
| <i>Tlr8</i>    | <b>2.57</b>   | <b>0.003939</b> | <b>2.4</b>    | <b>0.01732</b>  | -1.07       | 0.765555        |
| <i>Tnf</i>     | <b>71.26</b>  | <b>0.034427</b> | <b>55.16</b>  | <b>0.025604</b> | -1.29       | 0.578279        |
| <i>Tyk2</i>    | -1.38         | 0.101193        | <b>-2.26</b>  | <b>0.008972</b> | -1.64       | 0.04999         |

---

## (ii) Genes with no significant fold-changes in any comparison group

| Gene symbol   | 1 v Resting <sup>b</sup> |                 | 1861 v Resting <sup>c</sup> |                 | 1861 v 1 <sup>d</sup> |                 |
|---------------|--------------------------|-----------------|-----------------------------|-----------------|-----------------------|-----------------|
|               | fold-change              | <i>p</i> -value | fold-change                 | <i>p</i> -value | fold-change           | <i>p</i> -value |
| <i>Apcs</i>   | -1.1                     | 0.681795        | 1.18                        | 0.634331        | 1.29                  | 0.41576         |
| <i>Ccl12</i>  | 2.37                     | 0.244037        | 2.83                        | 0.134017        | 1.19                  | 0.526123        |
| <i>Ccl5</i>   | 1.88                     | 0.2097          | 3.16                        | 0.054793        | 1.69                  | 0.15042         |
| <i>Ccr4</i>   | 2.47                     | 0.683088        | 3.11                        | 0.385396        | 1.26                  | 0.309677        |
| <i>Ccr6</i>   | 1.39                     | 0.624149        | -1.41                       | 0.766939        | -1.96                 | 0.44634         |
| <i>Ccr8</i>   | 1.56                     | 0.411407        | 2.89                        | 0.061961        | 1.85                  | 0.492229        |
| <i>Cd4</i>    | -2.38                    | 0.331259        | -3.26                       | 0.29868         | -1.37                 | 0.277646        |
| <i>Cd40lg</i> | -1.46                    | 0.323142        | 1.06                        | 0.892685        | 1.55                  | 0.217032        |
| <i>Cd8a</i>   | -2.39                    | 0.351103        | -2.06                       | 0.36493         | 1.16                  | 0.46977         |
| <i>Cxcr3</i>  | -1.08                    | 0.945753        | 1.08                        | 0.885355        | 1.17                  | 0.864216        |
| <i>Fasl</i>   | 2.13                     | 0.289239        | 2.46                        | 0.16419         | 1.16                  | 0.692838        |
| <i>Foxp3</i>  | -1.11                    | 0.995684        | 1.07                        | 0.679392        | 1.19                  | 0.725564        |
| <i>Gata3</i>  | -1.6                     | 0.640001        | -1.7                        | 0.379356        | -1.06                 | 0.811623        |
| <i>H2-Q10</i> | -1.33                    | 0.422194        | 11.44                       | 0.172809        | 15.25                 | 0.163106        |
| <i>Ifnar1</i> | 1.08                     | 0.58143         | 1.06                        | 0.707629        | -1.02                 | 0.979097        |
| <i>Ifngr1</i> | 1.39                     | 0.300099        | -1.49                       | 0.086573        | -2.07                 | 0.076628        |
| <i>Il18</i>   | -1.22                    | 0.400888        | -1.09                       | 0.938618        | 1.12                  | 0.518727        |
| <i>Il2</i>    | -1.1                     | 0.681795        | 1.21                        | 0.617857        | 1.32                  | 0.399063        |
| <i>Il4</i>    | 1.1                      | 0.850322        | 1.23                        | 0.572083        | 1.12                  | 0.645832        |
| <i>Il5</i>    | -1.14                    | 0.444136        | -1.84                       | 0.0646          | -1.6                  | 0.110326        |
| <i>Irak1</i>  | -1.26                    | 0.428542        | -1                          | 0.888859        | 1.25                  | 0.407765        |
| <i>Irf3</i>   | 1.07                     | 0.825579        | 1.1                         | 0.705157        | 1.02                  | 0.844627        |
| <i>Ly96</i>   | 1.91                     | 0.163368        | 3.5                         | 0.096499        | 1.83                  | 0.181165        |

|               |       |          |       |          |       |          |
|---------------|-------|----------|-------|----------|-------|----------|
| <i>Lyz2</i>   | -1.05 | 0.836131 | -1.13 | 0.640551 | -1.07 | 0.764977 |
| <i>Mapk1</i>  | 1.09  | 0.908832 | 1.1   | 0.978388 | 1.01  | 0.823333 |
| <i>Mapk8</i>  | -1.23 | 0.39928  | -1.22 | 0.443913 | 1.01  | 0.946208 |
| <i>Mbl2</i>   | -1.1  | 0.681795 | 1.18  | 0.634331 | 1.29  | 0.41576  |
| <i>Mpo</i>    | -1.06 | 0.599446 | 1.48  | 0.542214 | 1.56  | 0.289215 |
| <i>Nfkbia</i> | 4.21  | 0.077436 | 2.78  | 0.08867  | -1.52 | 0.449863 |
| <i>Nod1</i>   | 1.45  | 0.443541 | 1.79  | 0.21366  | 1.23  | 0.707567 |
| <i>Rag1</i>   | -3.25 | 0.358134 | -2.89 | 0.358978 | 1.13  | 0.848791 |
| <i>Rorc</i>   | -1.03 | 0.649484 | 1.1   | 0.727201 | 1.13  | 0.693618 |
| <i>Stat4</i>  | 1.36  | 0.278205 | 1.17  | 0.500363 | -1.16 | 0.923067 |
| <i>Stat6</i>  | -1.34 | 0.230186 | -1.58 | 0.088741 | -1.18 | 0.318688 |
| <i>Tbx21</i>  | 1.25  | 0.361167 | 1.56  | 0.080417 | 1.25  | 0.530412 |
| <i>Ticam1</i> | -1.15 | 0.919751 | -1.41 | 0.385692 | -1.22 | 0.384671 |
| <i>Tlr1</i>   | 1.75  | 0.629    | 1.19  | 0.853545 | -1.47 | 0.111512 |
| <i>Tlr6</i>   | 2.45  | 0.104283 | 1.7   | 0.371744 | -1.44 | 0.22099  |
| <i>Tlr7</i>   | 1.38  | 0.264071 | 1.63  | 0.176654 | 1.18  | 0.488009 |
| <i>Tlr9</i>   | 1.54  | 0.317272 | 2.17  | 0.142154 | 1.41  | 0.760335 |
| <i>Traf6</i>  | 1.12  | 0.50961  | -1.42 | 0.041702 | -1.59 | 0.200091 |

<sup>a</sup> Animals (n=4 per group) were challenged with 10<sup>7</sup> CFU of Strain 1 or Strain 1861, or left unchallenged (“resting”). Lungs were harvested for RNA isolation at 6h post-challenge and immune response gene expression analysed using Mouse Innate and Adaptive Immune Responses RT<sup>2</sup> Profiler™ PCR Arrays. Significant changes in expression were considered to be fold-change ≥ 2, *P* < 0.05. These are highlighted in bold.

<sup>b,c</sup> Changes in gene expression in lungs from challenged animals relative to resting controls.

<sup>d</sup> Changes in gene expression in lungs from animals challenged with strain 1861 relative to lungs from animals challenged with strain 1.

**Table S2****Mouse Type I Interferon Response<sup>a</sup>**

(i) Genes with significant fold-change in at least one comparison group

| <b>Gene symbol</b> | <b>1 v Resting<sup>b</sup></b> |                 | <b>1861 v Resting<sup>c</sup></b> |                 | <b>1861 v 1<sup>d</sup></b> |                 |
|--------------------|--------------------------------|-----------------|-----------------------------------|-----------------|-----------------------------|-----------------|
|                    | <b>fold-change</b>             | <b>p-value</b>  | <b>fold-change</b>                | <b>p-value</b>  | <b>fold-change</b>          | <b>p-value</b>  |
| <i>Adar</i>        | <b>2.09</b>                    | <b>0.001694</b> | <b>3.6</b>                        | <b>0.013804</b> | <i>1.73</i>                 | <i>0.08305</i>  |
| <i>Bst2</i>        | <i>-3.49</i>                   | <i>0.494485</i> | <i>2.26</i>                       | <i>0.053515</i> | <b>7.89</b>                 | <b>0.038312</b> |
| <i>Casp1</i>       | <i>2.45</i>                    | <i>0.086648</i> | <b>5.38</b>                       | <b>0.028155</b> | <i>2.19</i>                 | <i>0.092263</i> |
| <i>Ccl2</i>        | <b>102.86</b>                  | <b>0.000023</b> | <b>421.53</b>                     | <b>0.001627</b> | <b>4.1</b>                  | <b>0.006165</b> |
| <i>Ccl4</i>        | <b>205.36</b>                  | <b>0.003604</b> | <b>817.17</b>                     | <b>0.000009</b> | <b>3.98</b>                 | <b>0.000208</b> |
| <i>Ccl5</i>        | <b>2.75</b>                    | <b>0.04857</b>  | <b>2.88</b>                       | <b>0.024565</b> | <i>1.05</i>                 | <i>0.918016</i> |
| <i>Cd69</i>        | <b>4.69</b>                    | <b>0.008531</b> | <b>16.85</b>                      | <b>0.048602</b> | <i>3.59</i>                 | <i>0.087165</i> |
| <i>Cd80</i>        | <b>21.59</b>                   | <b>0.023778</b> | <b>24.29</b>                      | <b>0.000271</b> | <i>1.13</i>                 | <i>0.909426</i> |
| <i>Cd86</i>        | <b>4.07</b>                    | <b>0.028551</b> | <b>5.98</b>                       | <b>0.005524</b> | <i>1.47</i>                 | <i>0.284102</i> |
| <i>Crp</i>         | <i>2.23</i>                    | <i>0.200209</i> | <b>10.53</b>                      | <b>0.00982</b>  | <b>4.73</b>                 | <b>0.029543</b> |
| <i>Cxcl10</i>      | <b>1490.93</b>                 | <b>0.017102</b> | <b>5770.58</b>                    | <b>0.004618</b> | <b>3.87</b>                 | <b>0.022306</b> |
| <i>Ddx58</i>       | <b>3.1</b>                     | <b>0.000535</b> | <b>6.21</b>                       | <b>0.00051</b>  | <b>2</b>                    | <b>0.008175</b> |
| <i>Eif2ak2</i>     | <b>3.94</b>                    | <b>0.000392</b> | <b>16.62</b>                      | <b>0.000085</b> | <b>4.22</b>                 | <b>0.000286</b> |
| <i>Gbp1</i>        | <b>8.95</b>                    | <b>0.000086</b> | <b>29.33</b>                      | <b>0.000025</b> | <b>3.28</b>                 | <b>0.000217</b> |
| <i>H2-D1</i>       | <i>1.69</i>                    | <i>0.137651</i> | <b>2.22</b>                       | <b>0.047964</b> | <i>1.31</i>                 | <i>0.355881</i> |
| <i>H2-K1</i>       | <i>-1.15</i>                   | <i>0.390231</i> | <b>2.22</b>                       | <b>0.014171</b> | <b>2.55</b>                 | <b>0.006709</b> |
| <i>H2-M10.1</i>    | <i>1.69</i>                    | <i>0.137651</i> | <b>2.22</b>                       | <b>0.047964</b> | <i>1.31</i>                 | <i>0.355881</i> |
| <i>H2-M3</i>       | <i>1.48</i>                    | <i>0.229106</i> | <b>2.78</b>                       | <b>0.002056</b> | <i>1.88</i>                 | <i>0.029088</i> |
| <i>Ifi204</i>      | <b>7.78</b>                    | <b>0.010679</b> | <b>18.82</b>                      | <b>0.000565</b> | <b>2.42</b>                 | <b>0.018512</b> |
| <i>Ifih1</i>       | <b>4.69</b>                    | <b>0.000283</b> | <b>20.39</b>                      | <b>0.006352</b> | <b>4.35</b>                 | <b>0.015216</b> |
| <i>Ifit1</i>       | <b>24.37</b>                   | <b>0.000912</b> | <b>77.82</b>                      | <b>0.002493</b> | <b>3.19</b>                 | <b>0.014211</b> |

|               |               |                 |               |                 |             |                 |
|---------------|---------------|-----------------|---------------|-----------------|-------------|-----------------|
| <i>Ifit2</i>  | <b>21.25</b>  | <b>0.000124</b> | <b>105.02</b> | <b>0.000146</b> | <b>4.94</b> | <b>0.000529</b> |
| <i>Ifit3</i>  | <b>3.09</b>   | <b>0.000625</b> | <b>9.22</b>   | <b>0.001351</b> | <b>2.98</b> | <b>0.00563</b>  |
| <i>Ifitm1</i> | <b>4.21</b>   | <b>0.000394</b> | <b>8.56</b>   | <b>0.004066</b> | <b>2.03</b> | <b>0.038504</b> |
| <i>Ifitm2</i> | 1.95          | 0.009609        | <b>3.52</b>   | <b>0.003333</b> | 1.81        | 0.026066        |
| <i>Ifitm3</i> | <b>2.65</b>   | <b>0.000106</b> | <b>4.68</b>   | <b>0.000043</b> | 1.77        | 0.000625        |
| <i>Ifna2</i>  | <b>5.99</b>   | <b>0.016795</b> | <b>17.26</b>  | <b>0.016971</b> | 2.88        | 0.068768        |
| <i>Ifna4</i>  | <b>7.94</b>   | <b>0.006256</b> | 9.3           | 0.147022        | 1.17        | 0.513417        |
| <i>Ifnar2</i> | 1.84          | 0.031686        | <b>2.32</b>   | <b>0.001468</b> | 1.26        | 0.275451        |
| <i>Ifnb1</i>  | <b>66</b>     | <b>0.03473</b>  | <b>106.12</b> | <b>0.032259</b> | 1.61        | 0.39231         |
| <i>Ifne</i>   | 1.69          | 0.137651        | <b>2.22</b>   | <b>0.047964</b> | 1.31        | 0.355881        |
| <i>Ifnz</i>   | 1.77          | 0.095132        | <b>2.22</b>   | <b>0.047964</b> | 1.25        | 0.393239        |
| <i>Il10</i>   | <b>7.23</b>   | <b>0.000609</b> | <b>14.85</b>  | <b>0.000541</b> | <b>2.05</b> | <b>0.015007</b> |
| <i>Il15</i>   | <b>2.7</b>    | <b>0.006081</b> | <b>9.95</b>   | <b>0.000014</b> | <b>3.69</b> | <b>0.000102</b> |
| <i>Il6</i>    | <b>229.84</b> | <b>0.022042</b> | <b>256.8</b>  | <b>0.000091</b> | 1.12        | 0.907939        |
| <i>Irf1</i>   | <b>5.33</b>   | <b>0.000067</b> | <b>11.59</b>  | <b>0.000303</b> | <b>2.17</b> | <b>0.005212</b> |
| <i>Irf2</i>   | 1.89          | 0.023468        | <b>3.32</b>   | <b>0.00161</b>  | 1.75        | 0.015338        |
| <i>Irf5</i>   | <b>4.16</b>   | <b>0.011652</b> | 3.19          | 0.098134        | -1.3        | 0.937401        |
| <i>Irf7</i>   | <b>7.32</b>   | <b>0.002524</b> | <b>19.83</b>  | <b>0.000105</b> | <b>2.71</b> | <b>0.002391</b> |
| <i>Irf9</i>   | <b>2.91</b>   | <b>0.001813</b> | <b>5.28</b>   | <b>0.000646</b> | 1.81        | 0.00877         |
| <i>Isg15</i>  | <b>26.3</b>   | <b>0.001784</b> | <b>110.24</b> | <b>0.00153</b>  | <b>4.19</b> | <b>0.00635</b>  |
| <i>Isg20</i>  | <b>3.21</b>   | <b>0.000065</b> | <b>7.31</b>   | <b>0.00019</b>  | <b>2.27</b> | <b>0.001934</b> |
| <i>Jak1</i>   | 1.84          | 0.025349        | <b>3.06</b>   | <b>0.00515</b>  | 1.66        | 0.021711        |
| <i>Jak2</i>   | <b>3.07</b>   | <b>0.004525</b> | <b>5.21</b>   | <b>0.000015</b> | 1.7         | 0.009038        |
| <i>Mx1</i>    | <b>24.08</b>  | <b>0.03047</b>  | <b>67.74</b>  | <b>0.000091</b> | <b>2.81</b> | <b>0.024421</b> |
| <i>Mx2</i>    | <b>14.12</b>  | <b>0.000315</b> | <b>34.05</b>  | <b>0.006458</b> | <b>2.41</b> | <b>0.04558</b>  |
| <i>Myd88</i>  | <b>3.62</b>   | <b>0.047628</b> | 3.01          | 0.087493        | -1.2        | 0.825569        |
| <i>Nos2</i>   | 1.57          | 0.023266        | <b>4.32</b>   | <b>0.009201</b> | <b>2.76</b> | <b>0.019864</b> |

|              |              |                 |              |                 |              |                 |
|--------------|--------------|-----------------|--------------|-----------------|--------------|-----------------|
| <i>Oas1a</i> | <b>5.59</b>  | <b>0.000632</b> | <b>18.76</b> | <b>0.000012</b> | <b>3.36</b>  | <b>0.000126</b> |
| <i>Oas1b</i> | 3.51         | 0.098534        | <b>13.73</b> | <b>0.013932</b> | 3.92         | 0.060844        |
| <i>Oas2</i>  | <b>4.16</b>  | <b>0.00000</b>  | <b>7.9</b>   | <b>0.005297</b> | 1.9          | 0.049354        |
| <i>Pml</i>   | 1.82         | 0.057354        | <b>3.49</b>  | <b>0.000146</b> | 1.92         | 0.018254        |
| <i>Psme2</i> | <b>2.26</b>  | <b>0.039652</b> | <b>5.88</b>  | <b>0.003546</b> | <b>2.6</b>   | <b>0.019732</b> |
| <i>Socs1</i> | 23.26        | 0.073031        | <b>98.5</b>  | <b>0.010876</b> | 4.24         | 0.052315        |
| <i>Stat1</i> | <b>3.1</b>   | <b>0.043775</b> | <b>10.02</b> | <b>0.000169</b> | <b>3.23</b>  | <b>0.003154</b> |
| <i>Stat2</i> | <b>3.38</b>  | <b>0.022449</b> | <b>8.98</b>  | <b>0.000073</b> | <b>2.66</b>  | <b>0.003261</b> |
| <i>Stat3</i> | <b>2.8</b>   | <b>0.003943</b> | <b>4.01</b>  | <b>0.00001</b>  | 1.43         | 0.031599        |
| <i>Tap1</i>  | <b>5.37</b>  | <b>0.000183</b> | <b>8.48</b>  | <b>0.000278</b> | 1.58         | 0.029406        |
| <i>Timpl</i> | <b>25.32</b> | <b>0.001053</b> | <b>63.21</b> | <b>0.014784</b> | 2.5          | 0.078742        |
| <i>Tlr3</i>  | 1.48         | 0.123601        | <b>2.71</b>  | <b>0.00243</b>  | 1.83         | 0.015348        |
| <i>Tlr8</i>  | <b>2.01</b>  | <b>0.040173</b> | <b>2.29</b>  | <b>0.01375</b>  | 1.14         | 0.600687        |
| <i>Traf3</i> | 1.24         | 0.239088        | -1.71        | 0.005748        | <b>-2.13</b> | <b>0.025507</b> |
| <i>Tyk2</i>  | -1.39        | 0.047608        | <b>-2.01</b> | <b>0.011672</b> | -1.45        | 0.113686        |

---

## (ii) Genes with no significant fold-changes in any comparison group

| Gene symbol     | 1 v Resting <sup>b</sup> |                 | 1861 v Resting <sup>c</sup> |                 | 1861 v 1 <sup>d</sup> |                 |
|-----------------|--------------------------|-----------------|-----------------------------|-----------------|-----------------------|-----------------|
|                 | fold-change              | <i>p</i> -value | fold-change                 | <i>p</i> -value | fold-change           | <i>p</i> -value |
| <i>Bag3</i>     | -1.33                    | 0.305242        | 1.29                        | 0.369599        | 1.72                  | 0.095586        |
| <i>Cav1</i>     | -1.28                    | 0.553136        | -1.57                       | 0.198045        | -1.22                 | 0.373188        |
| <i>Cd70</i>     | 1.94                     | 0.284339        | 1.84                        | 0.322525        | -1.06                 | 0.628119        |
| <i>Cdkn1b</i>   | -1.49                    | 0.174182        | -1.38                       | 0.124661        | 1.08                  | 0.863391        |
| <i>Ciita</i>    | -1.08                    | 0.800801        | 1.12                        | 0.435408        | 1.21                  | 0.836752        |
| <i>H2-BI</i>    | -1.35                    | 0.115592        | -1.26                       | 0.323271        | 1.07                  | 0.627968        |
| <i>H2-T10</i>   | -2.26                    | 0.362928        | 9.86                        | 0.234151        | 22.28                 | 0.188749        |
| <i>Ifi30</i>    | 1.75                     | 0.196318        | 1.23                        | 0.85751         | -1.42                 | 0.031016        |
| <i>Ifnar1</i>   | 1.13                     | 0.332325        | -1                          | 0.967456        | -1.13                 | 0.412895        |
| <i>Irf3</i>     | -1.06                    | 0.979114        | 1.07                        | 0.741029        | 1.13                  | 0.75859         |
| <i>Mal</i>      | 1.22                     | 0.379471        | -1.04                       | 0.803365        | -1.26                 | 0.736138        |
| <i>Met</i>      | -1.1                     | 0.620865        | -1.62                       | 0.04001         | -1.47                 | 0.05535         |
| <i>Nmi</i>      | 1.52                     | 0.204057        | 3.14                        | 0.0633          | 2.07                  | 0.118295        |
| <i>Prkcz</i>    | -1.14                    | 0.529683        | -1.69                       | 0.116947        | -1.48                 | 0.152733        |
| <i>Shb</i>      | 1.7                      | 0.045891        | 1.75                        | 0.012511        | 1.03                  | 0.933661        |
| <i>Sh2d1a</i>   | -1.6                     | 0.383735        | -1.61                       | 0.402283        | -1                    | 0.827181        |
| <i>Ticam1</i>   | 1.09                     | 0.722986        | -1.67                       | 0.154694        | -1.82                 | 0.149367        |
| <i>Tlr7</i>     | 1.37                     | 0.19618         | 1.34                        | 0.195115        | -1.02                 | 0.876122        |
| <i>Tlr9</i>     | -1.27                    | 0.621398        | -1.41                       | 0.591035        | -1.11                 | 0.913773        |
| <i>Tnfrsf10</i> | 1.04                     | 0.833337        | 1.46                        | 0.052335        | 1.41                  | 0.108623        |
| <i>Vegfa</i>    | 1.08                     | 0.802504        | -1.2                        | 0.354747        | -1.29                 | 0.236168        |

<sup>a</sup> Animals (n=4 per group) were challenged with 10<sup>7</sup> CFU of Strain 1 or Strain 1861, or left unchallenged (“resting”). Lungs were harvested for RNA isolation at 6h post-challenge and



immune response gene expression analysed using Mouse Type I Interferon Response RT<sup>2</sup> Profiler™ PCR Arrays. Significant changes in expression were considered to be fold-change  $\geq 2$ ,  $P < 0.05$ . These are highlighted in bold.

<sup>b,c</sup> Changes in gene expression in lungs from challenged animals relative to resting controls.

<sup>d</sup> Changes in gene expression in lungs from animals challenged with strain 1861 relative to lungs from animals challenged with strain 1.

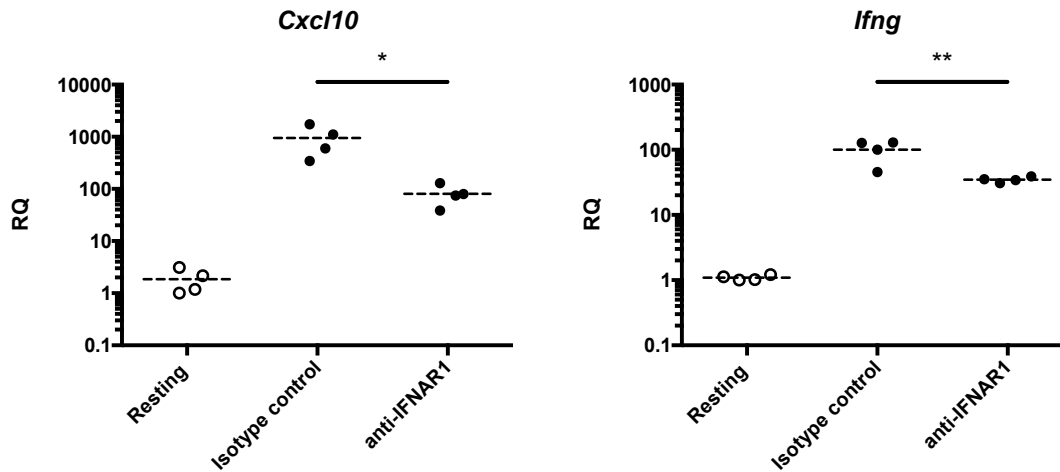

**Figure S1. Confirming suppression of IFN-I response by measurement of IFN-I responsive gene expression.** *Cxcl10* and *Ifng* expression was determined by qRT-PCR, comparing mRNA from lungs of strain 1861-infected mice at 6 h post challenge (filled circles) treated with either the isotype control or anti-IFNAR1 antibody, relative to an uninfected resting control group (open circles). A statistically significant difference in relative expression between isotype-treated and anti-IFNAR1 antibody-treated groups was determined by one-way ANOVA with Tukey's multiple comparison test, \* =  $P < 0.05$ , \*\* =  $P < 0.01$ .
